# Supplementary material for: Three-coordinate late transition metal fluorinated alkoxide complexes
Source: Royal Society of Chemistry journal article supplement (doi:10.1039/b911758j), 2009-10-16
Supplement: b911758j.pdf [file b911758j.pdf]

## Three-Coordinate Late Transition Metal Fluorinated Alkoxide Complexes

Stefanie A. Cantalupo, June S. Lum, Marisa C. Buzzeo, Curtis Moore, Antonio G. DiPasquale, Arnold L. Rheingold and Linda H. Doerrer\*

Table S1. Selected Interatomic Distances and Angles for 1.<sup>a</sup>

| Compound | Distance | (Å)      | Angle    | (°)      |
|----------|----------|----------|----------|----------|
| 1        | K1—O1    | 2.746(2) | O1—K1—O4 | 80.28(6) |
|          | K1—O3    | 2.689(2) | O1—K1—O3 | 82.17(6) |
|          | K1—O4    | 2.745(2) | O1—K2—O3 | 83.18(7) |
|          | K2—O1    | 2.686(2) | O1—K2—O2 | 80.48(6) |
|          | K2—O2    | 2.698(2) | O1—K3—O4 | 83.27(6) |
|          | K2—O3    | 2.695(2) | O1—K3—O2 | 81.36(6) |
|          | K3—O1    | 2.658(2) | O2—K2—O3 | 82.48(6) |
|          | K3—O2    | 2.677(2) | O2—K3—O4 | 82.70(7) |
|          | K3—O4    | 2.670(2) | O2—K4—O4 | 81.27(7) |
|          | K4—O2    | 2.695(2) | O3—K1—O4 | 82.39(6) |
|          | K4—O3    | 2.740(2) | O2—K4—O3 | 81.70(6) |
|          | K4—O4    | 2.729(2) | O3—K4—O4 | 81.77(6) |
|          | O1—C1    | 1.345(3) |          |          |
|          | O2—C5    | 1.348(3) |          |          |
|          | O3—C9    | 1.348(3) |          |          |
|          | O4—C13   | 1.348(3) |          |          |
|          | K1...F5  | 3.032(2) |          |          |
|          | K1...F8  | 3.045(2) |          |          |
|          | K1...F24 | 3.063(2) |          |          |
|          | K1...F26 | 3.237(3) |          |          |
| K1...F28 | 3.050(2) |          |          |          |
| K1...F31 | 3.248(2) |          |          |          |

<sup>a</sup>Numbers in parentheses are estimated deviations of the last significant figure.

**Table S2.** Selected Interatomic Distances and Angles in  $[\text{MX}_3]^-$  Compounds.<sup>a</sup>

| Compound                                                                       | X-ray           |            | DFT      |        |
|--------------------------------------------------------------------------------|-----------------|------------|----------|--------|
|                                                                                | Distance        | (Å)        | Distance | (Å)    |
| <b>[Co(OC<sub>4</sub>F<sub>9</sub>)<sub>3</sub>]<sup>-</sup></b><br>This work  | Co(1)-O(1)      | 1.9143(18) | Co-O     | 1.852  |
|                                                                                | Co(1)-O(2)      | 1.8810(19) | Co-O     | 1.820  |
|                                                                                | Co(1)-O(3)      | 1.9262(18) | Co-O     | 1.788  |
|                                                                                | Angle (°)       |            |          |        |
|                                                                                | O(1)-Co(1)-O(2) | 128.38(9)  | O-Co-O   | 114.55 |
|                                                                                | O(2)-Co(1)-O(3) | 124.39(9)  | O-Co-O   | 129.98 |
| O(1)-Co(1)-O(3)                                                                | 107.23(8)       | O-Co-O     | 115.47   |        |
| <b>[Co(mes)<sub>3</sub>]<sup>-</sup></b><br>No pub X-ray                       |                 |            | Co-C     | 2.100  |
|                                                                                |                 |            | Co-C     | 2.100  |
|                                                                                |                 |            | Co-C     | 2.100  |
|                                                                                |                 |            | C-Co-C   | 120.0  |
|                                                                                |                 |            | C-Co-C   | 120.0  |
|                                                                                |                 |            | C-Co-C   | 120.0  |
| <b>[Co{N(TMS)<sub>2</sub>}<sub>3</sub>]<sup>-</sup></b><br>TEGCEN <sup>b</sup> | Co(1)-N(1)      | 1.974      |          | 1.909  |
|                                                                                | Co(1)-N(2)      | 1.980      |          | 1.910  |
|                                                                                | Co(1)-N(3)      | 1.974      |          | 1.910  |
|                                                                                | Angle (°)       |            |          |        |
|                                                                                | N(1)-Co(1)-N(2) | 120.54     |          | 119.92 |
|                                                                                | N(2)-Co(1)-N(3) | 119.13     |          | 120.01 |
| N(1)-Co(1)-N(3)                                                                | 120.34          |            | 120.07   |        |

<sup>a</sup>Numbers in parentheses are estimated deviations of the last significant figure.

<sup>b</sup>M. A. Putzer, B. Neumueller, K. Behnicke, and J. Magull, *Chem. Ber.*, 1996, **129**, 715-719.

**Table S3.** Alpha and Beta Spin-Orbital Energies and Averages.

| Compound                                                         | Orbital   | Dominant <i>d</i>              |  | Alpha     | Beta      | Average    |
|------------------------------------------------------------------|-----------|--------------------------------|--|-----------|-----------|------------|
|                                                                  |           | Character                      |  |           |           |            |
| [Co(OC <sub>4</sub> H <sub>9</sub> ) <sub>3</sub> ] <sup>-</sup> | 25a''     | xz                             |  | -0.317548 | 1.024113  | 0.3532825  |
|                                                                  | 52a'      | xy                             |  | -0.576271 | 1.256097  | 0.339913   |
|                                                                  | 51a'      | x <sup>2</sup> -y <sup>2</sup> |  | -0.741358 | 1.208673  | 0.2336575  |
|                                                                  | 24a''     | yz                             |  | -0.937934 | 0.934854  | -0.00154   |
|                                                                  | 50a'      | z <sup>2</sup>                 |  | -1.016947 | 0.37322   | -0.3218635 |
| [Co(OC <sub>4</sub> F <sub>9</sub> ) <sub>3</sub> ] <sup>-</sup> | 76a''     | xz                             |  | -2.592487 | -1.039124 | -1.8158055 |
|                                                                  | 109a'     | x <sup>2</sup> -y <sup>2</sup> |  | -2.746703 | -0.746396 | -1.7465495 |
|                                                                  | 108a'     | xy                             |  | -3.056187 | -0.991624 | -2.0239055 |
|                                                                  | 75a''     | yz                             |  | -3.195316 | -1.251635 | -2.2234755 |
|                                                                  | 107a'     | z <sup>2</sup>                 |  | -3.245534 | -1.653905 | -2.4497195 |
| [Co{N(TMS) <sub>2</sub> } <sub>3</sub> ] <sup>-</sup>            | 149a      | xy                             |  | -0.937711 | 0.701829  | -0.117941  |
|                                                                  | 148a      | x <sup>2</sup> -y <sup>2</sup> |  | -0.940376 | 0.699222  | -0.120577  |
|                                                                  | 147a/145a | yz                             |  | -1.755208 | -0.419265 | -1.0872365 |
|                                                                  | 146a      | xz                             |  | -1.759261 | -0.416847 | -1.088054  |
|                                                                  | 144a/147a | z <sup>2</sup>                 |  | -2.650698 | -0.278061 | -1.4643795 |
| [Co(mes) <sub>3</sub> ] <sup>-</sup>                             | 113a      | xy                             |  | -0.442    | 0.692861  | 0.1254305  |
|                                                                  | 112a      | x <sup>2</sup> -y <sup>2</sup> |  | -0.44231  | 0.692701  | 0.1251955  |
|                                                                  | 111a/109a | yz                             |  | -1.649726 | -0.387672 | -1.018699  |
|                                                                  | 110a      | xz                             |  | -1.64981  | -0.387365 | -1.0185875 |
|                                                                  | 109a/111a | z <sup>2</sup>                 |  | -2.158649 | 0.0088    | -1.0749245 |

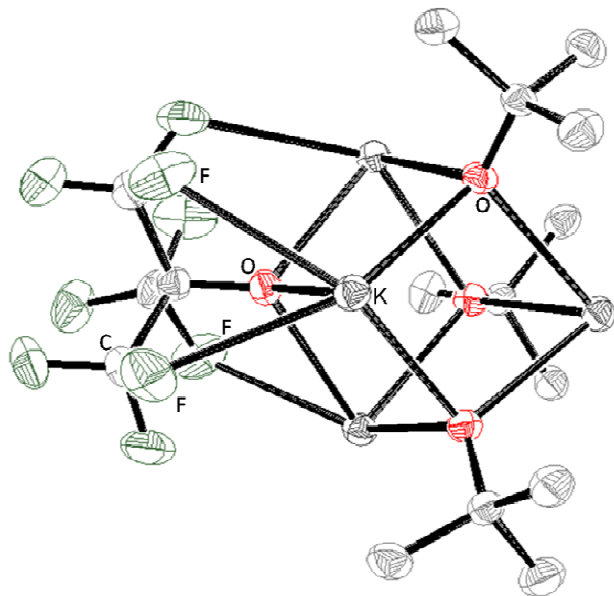

**Figure S1.** ORTEP of **1** with most F atoms removed for clarity. Ellipsoids are shown at the 50% probability level.

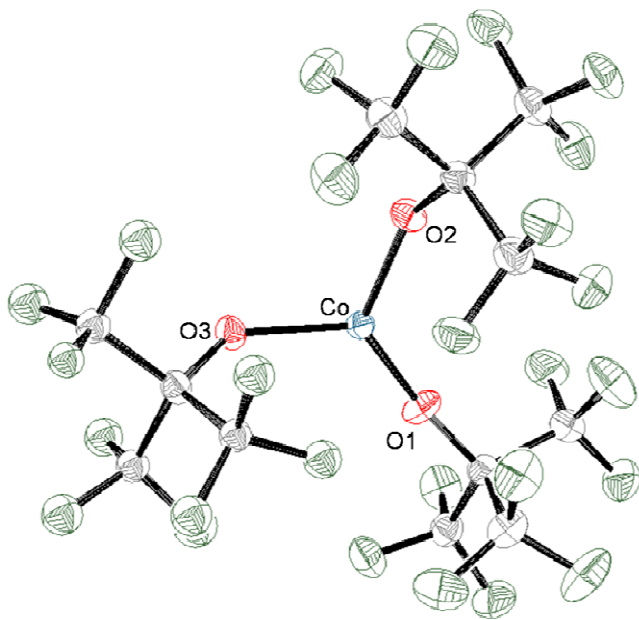

**Figure S2.** ORTEP of **4** with  $\{K(18C6)\}^+$  cation removed for clarity. Ellipsoids are shown at the 50% probability level.

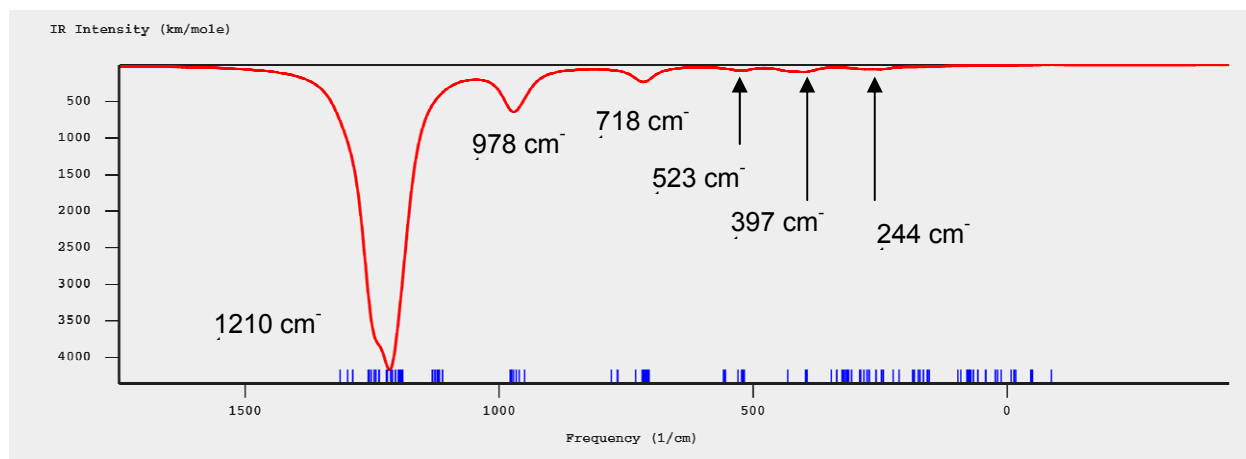

**Figure S3.** DFT frequency calculation of **4**.

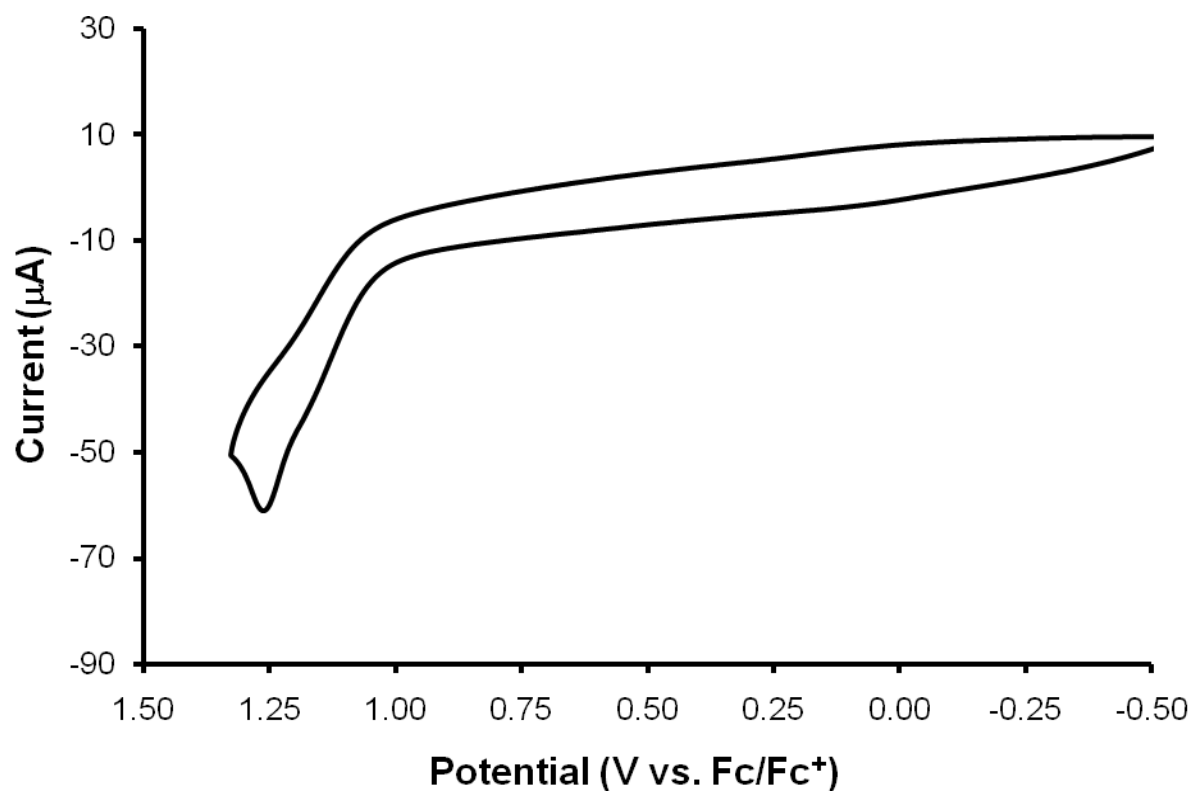

**Figure S4.** Cyclic voltammogram of 5 mM KOC<sub>4</sub>F<sub>9</sub>, **1**, in 0.1 M TBAPF<sub>6</sub>/CH<sub>2</sub>Cl<sub>2</sub> (scan rate 100 mVs<sup>-1</sup>).

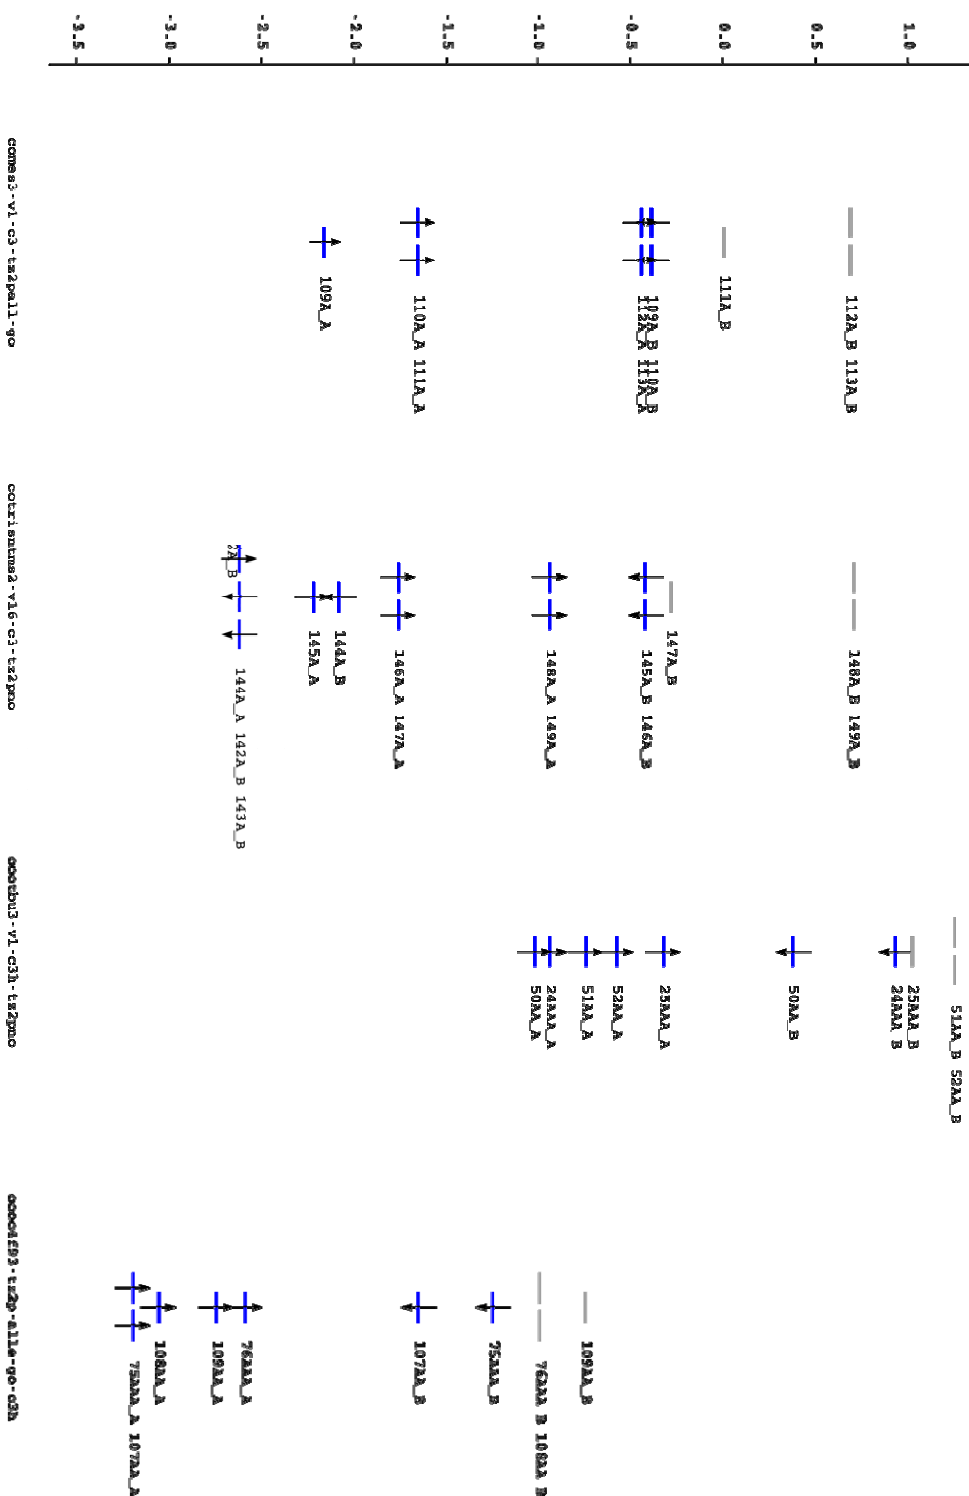

**Figure S5.** Comparison of *d*-manifold spin-orbital energies among four [CoX<sub>3</sub>]<sup>-</sup> species. See tabulation in Table S3 for exact energies and *d*-character assignments.

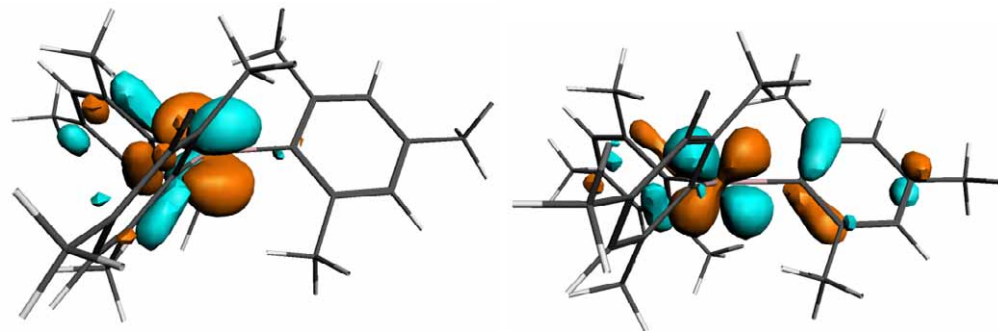

**Figure S6.**  $[\text{Co}(\text{mes})_3]^-$  spin orbitals 110a ( $\alpha d_{xz}$ ) (left) and 111a ( $\alpha d_{yz}$ ) (right).

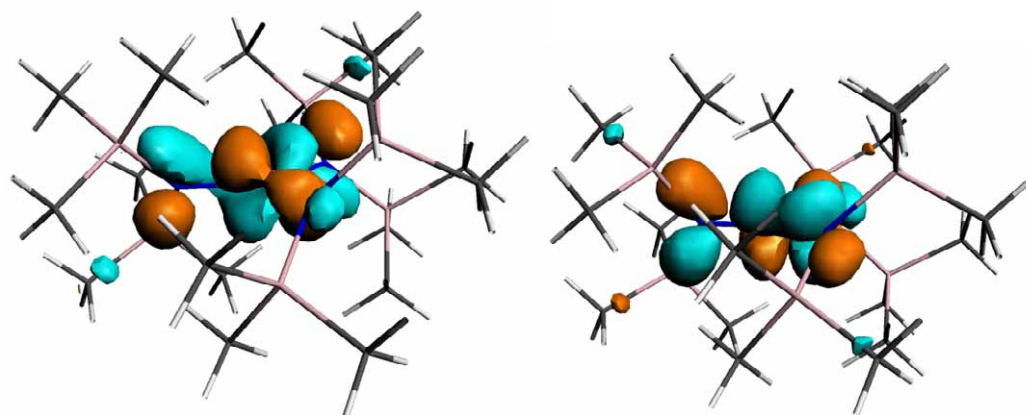

**Figure S7.**  $[\text{Co}\{\text{N}(\text{TMS})_2\}_3]^-$  spin orbitals 146a ( $\alpha d_{xz}$ ) (left) and 147a ( $\alpha d_{yz}$ ) (right).
